# Supplementary material for: Variable energy transfer in one-dimensional chiral Mn/Cd-based halides and strong stereo-selective fluorescence for chiral recognition
Source: Royal Society of Chemistry journal article supplement (doi:10.1039/d4qi01703j), 2024-01-01
Supplement: d4qi01703j1.pdf [file d4qi01703j1.pdf]

## Supporting Information

### **Variable Energy Transfer in One-Dimensional Chiral Mn/Cd-Based Halides and the Strong Stereo-Selective Fluorescence for Chiral Recognition**

Sidan Wang,<sup>#a</sup> Pei Wang,<sup>#a</sup> Guojun Zhou,<sup>\*a</sup> Nan Zhang,<sup>a</sup> Yilin Mao,<sup>a</sup> Xian-Ming Zhang<sup>\*a,b</sup>

<sup>a</sup> *Key Laboratory of Magnetic Molecules and Magnetic Information Materials (Ministry of Education), School of Chemistry and Material Science, Shanxi Normal University, Taiyuan 030031, China.*

<sup>b</sup> *College of Chemistry & Chemical Engineering, Key Laboratory of Interface Science and Engineering in Advanced Material, Ministry of Education, Taiyuan University of Technology, Taiyuan, Shanxi 030024, P. R. China.*

*\*Corresponding author. Key Laboratory of Magnetic Molecules and Magnetic Information Materials (Ministry of Education), School of Chemistry and Material Science, Shanxi Normal University, Taiyuan 030031, China*

*#These two authors as co-first authors contribute equally to this work.*

*E-mail addresses: [zhougj@sxnu.edu.cn](mailto:zhougj@sxnu.edu.cn) (G. J. Zhou), [zhangxm@dns.sxnu.edu.cn](mailto:zhangxm@dns.sxnu.edu.cn) (X.M. Zhang).*

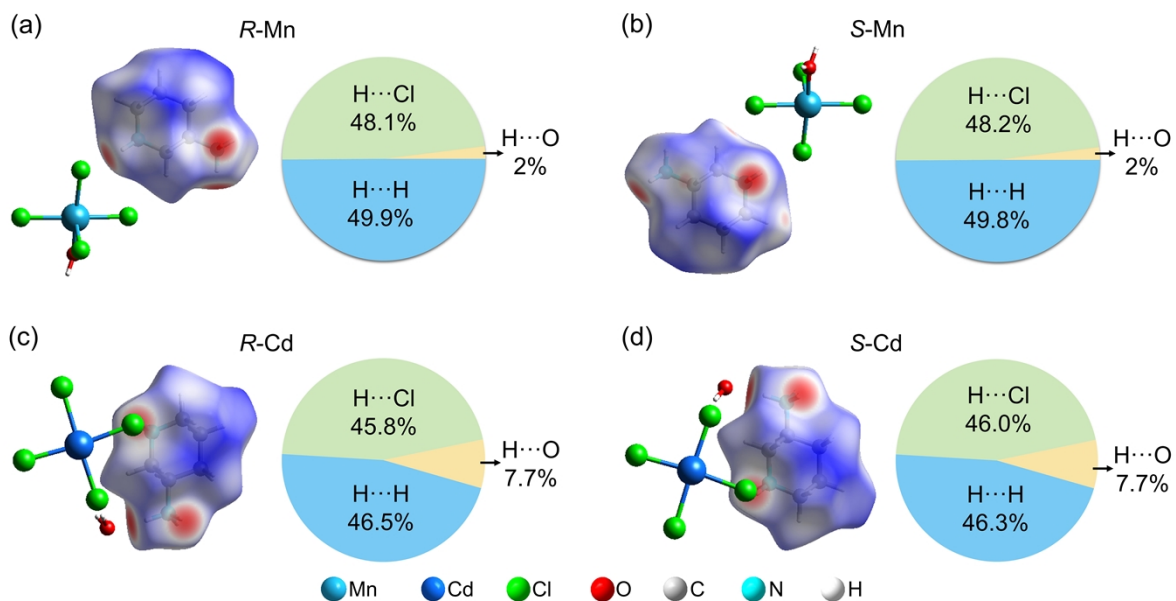

**Fig. S1.** The Hirshfeld surface analysis of organic cations and intermolecular interactions contribution diagram of *R*-Mn (a), *S*-Mn (b), *R*-Cd (c) and *S*-Cd (d) calculated by CrystalExplorer software.

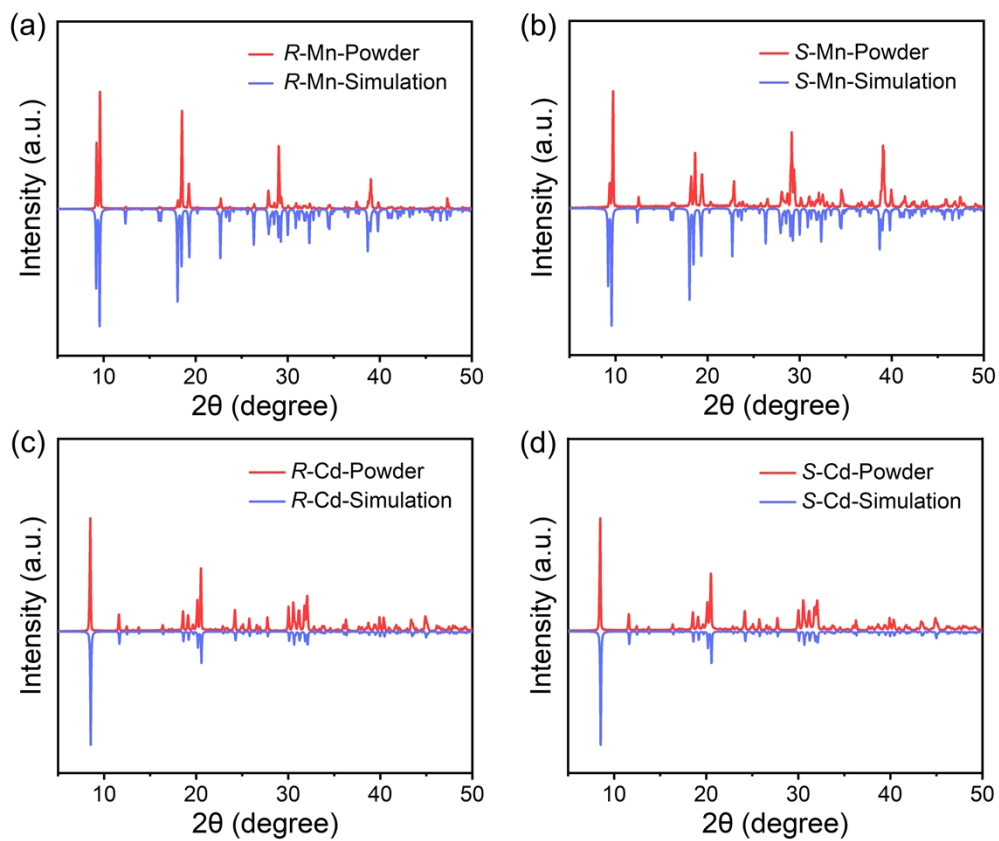

**Fig. S2.** Powder XRD of *R*-Mn (a), *S*-Mn (b), *R*-Cd (c) and *S*-Cd (d) compared with the simulated data from the single crystal structures.

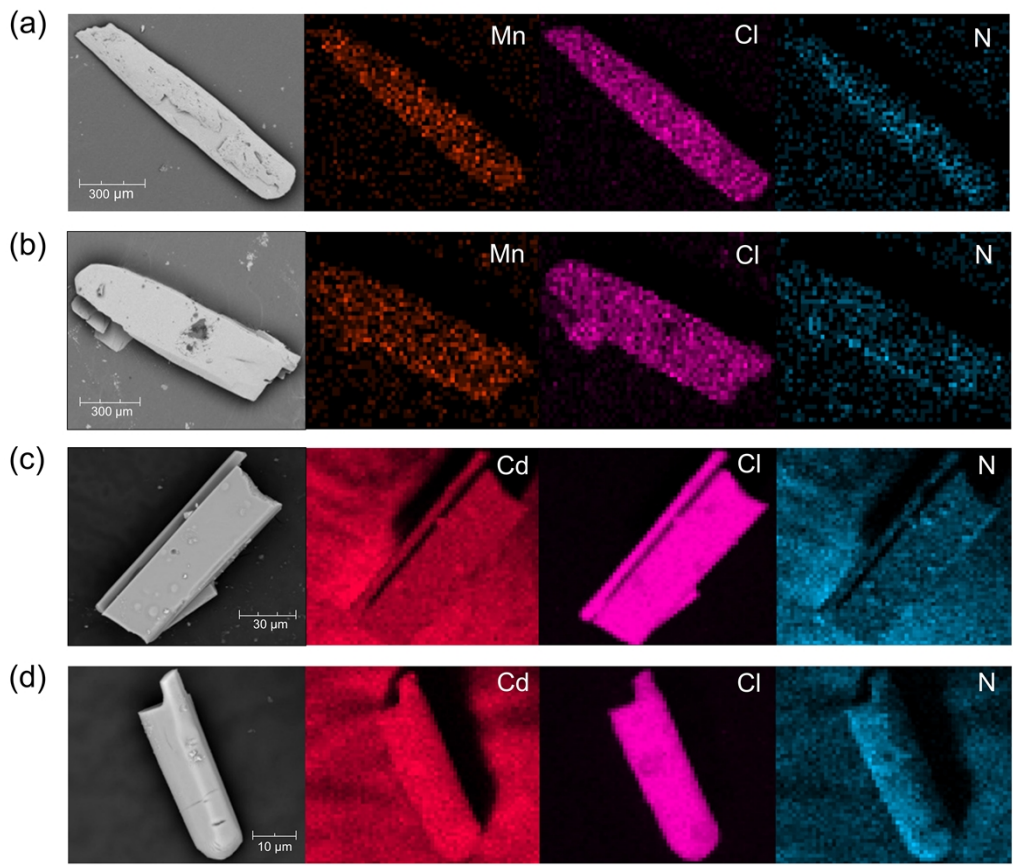

**Fig. S3.** SEM image and elemental mapping of Mn, Cl, and N of *R*-Mn (a) and *S*-Mn (b). SEM image and elemental mapping of Cd, Cl, and N of *R*-Cd (c) and *S*-Cd (d).

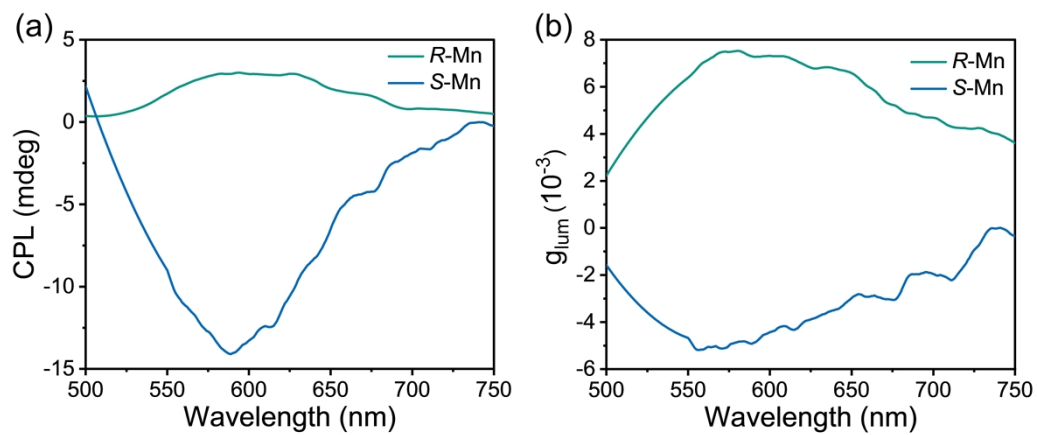

**Fig. S4.** (a) Circularly polarized luminescence (CPL) spectra of *R/S*-Mn. (b) The  $g_{lum}$  of *R/S*-Mn.

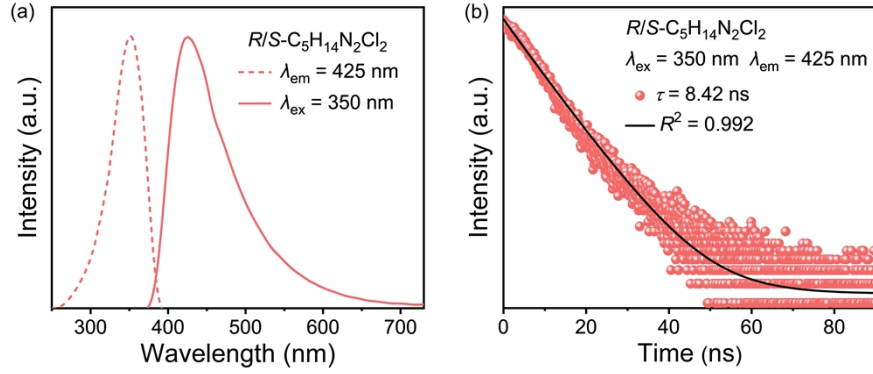

**Fig. S5.** (a) PLE and PL spectra of  $R/S-C_5H_{14}N_2Cl_2$ . (b) PL decay curve of  $R/S-C_5H_{14}N_2Cl_2$ .

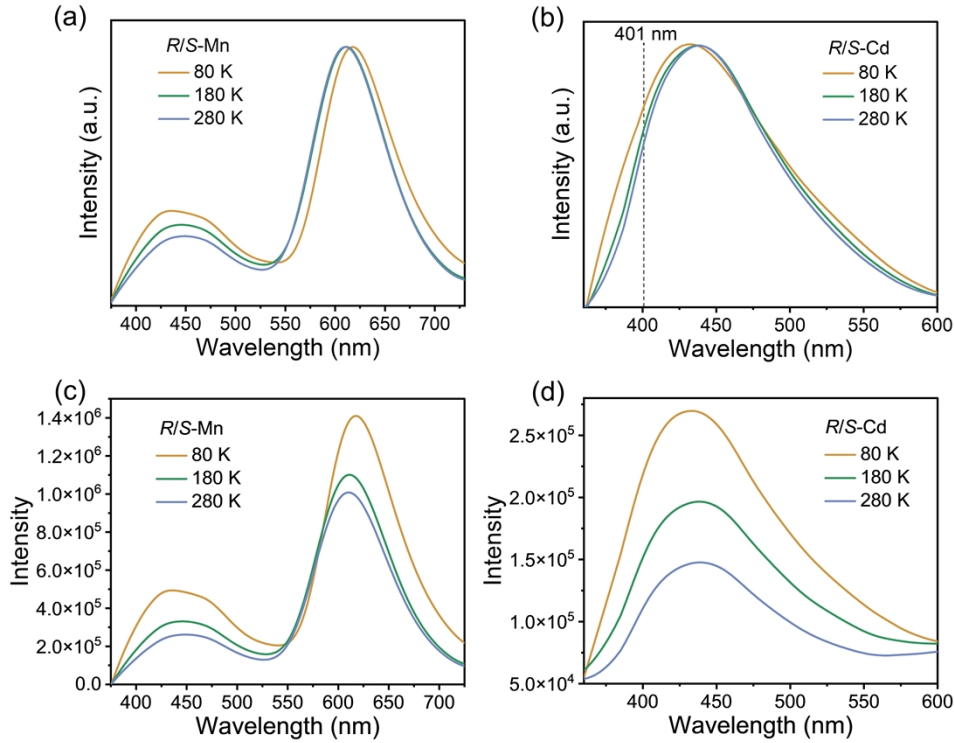

**Fig. S6.** (a) Normalized PL spectra of  $R/S-Mn$  at 80 k, 180 k and 280 k. (b) Normalized PL spectra of  $R/S-Cd$  at 80 k, 180 k and 280 k. (c) PL spectra of  $R/S-Mn$  at 80 k, 180 k and 280 k. (d) PL spectra of  $R/S-Cd$  at 80 k, 180 k and 280 k.

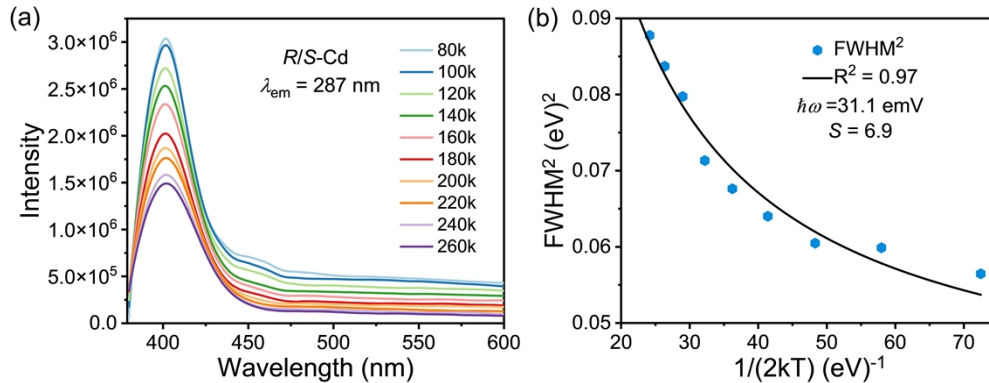

**Fig. S7.** (a) Temperature-dependent PL spectra of  $R/S-Cd$  at 287 nm excitation. (b) The  $FWHM^2$  fitting curve of  $R/S-Cd$  as a function of  $1/(2kT)$ .

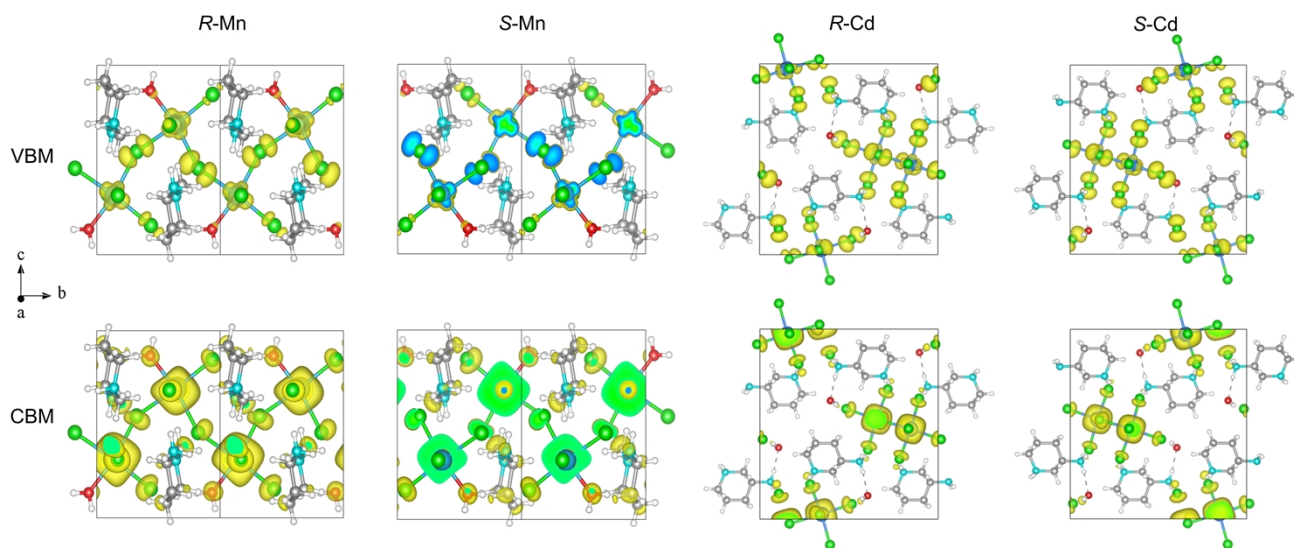

**Fig. S8.** The calculated charge densities of *R*-Mn, *S*-Mn, *R*-Cd and *S*-Cd.

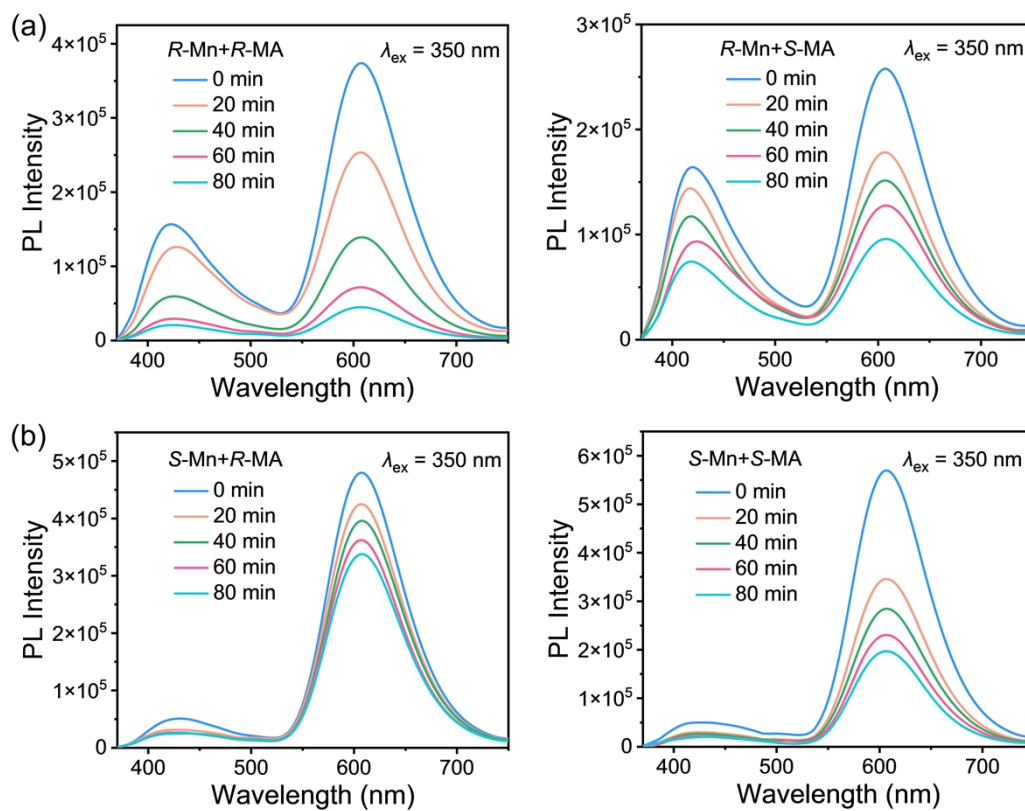

**Fig. S9.** PL intensity of *R*-Mn (a) and *S*-Mn (b) in the presence of *R* or *S*-MA over time.  $\lambda_{\text{ex}} = 350$  nm, slit = 1.7/1.7 nm.

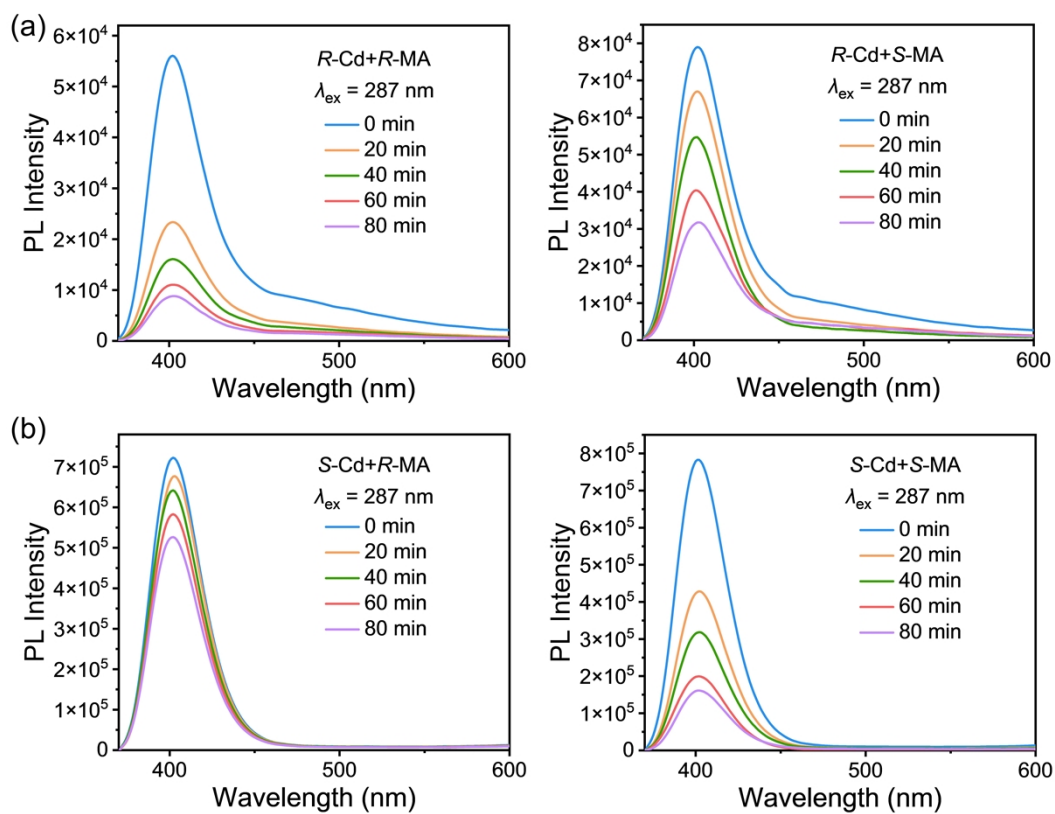

**Fig. S10.** PL intensity of *R*-Cd (a) and *S*-Cd (b) in the presence of *R* or *S*-MA over time.  $\lambda_{\text{ex}} = 287$  nm, slit = 1.5/1.5 nm.

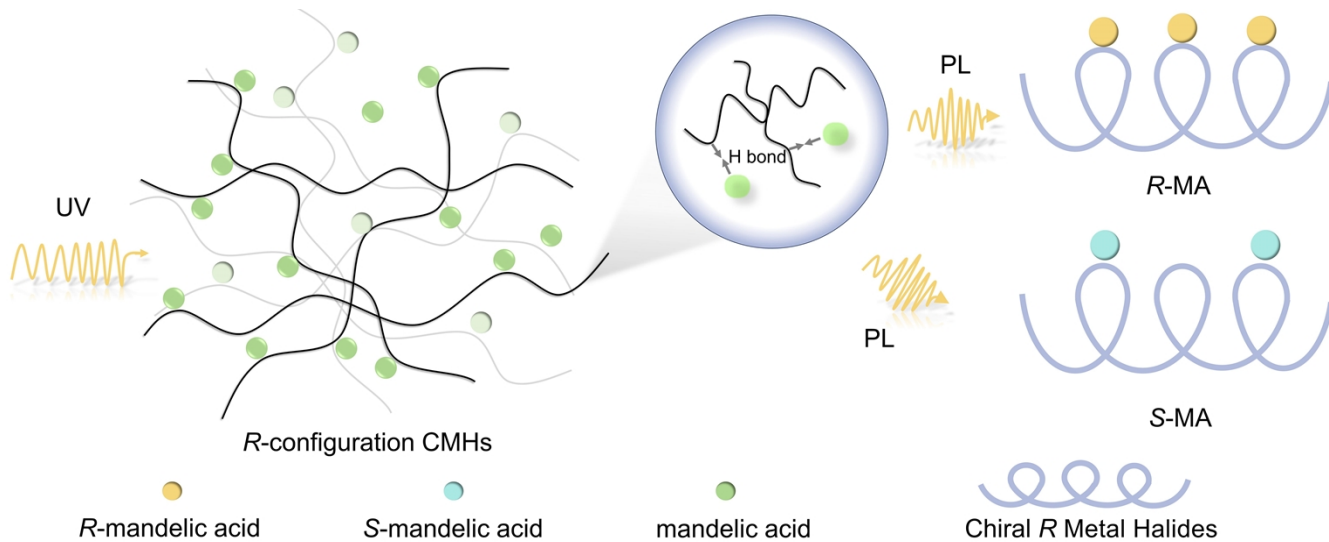

**Fig. S11.** Schematic diagram of identifying MA based on differences in PL quenching of *R*-configuration CMHs.

**Table S1.** Crystal data and structure refinement for *R*-Mn, *S*-Mn, *R*-Cd and *S*-Cd.

|                                                  | <i>R</i> -Mn                                                                                   | <i>S</i> -Mn                                                                                   | <i>R</i> -Cd                                                                                   | <i>S</i> -Cd                                                                                   |
|--------------------------------------------------|------------------------------------------------------------------------------------------------|------------------------------------------------------------------------------------------------|------------------------------------------------------------------------------------------------|------------------------------------------------------------------------------------------------|
| Empirical formula                                | ( <i>R</i> -C <sub>5</sub> H <sub>14</sub> N <sub>2</sub> )MnCl <sub>4</sub> ·H <sub>2</sub> O | ( <i>S</i> -C <sub>5</sub> H <sub>14</sub> N <sub>2</sub> )MnCl <sub>4</sub> ·H <sub>2</sub> O | ( <i>R</i> -C <sub>5</sub> H <sub>14</sub> N <sub>2</sub> )CdCl <sub>4</sub> ·H <sub>2</sub> O | ( <i>S</i> -C <sub>5</sub> H <sub>14</sub> N <sub>2</sub> )CdCl <sub>4</sub> ·H <sub>2</sub> O |
| Formula weight                                   | 316.94                                                                                         | 316.94                                                                                         | 374.4                                                                                          | 374.4                                                                                          |
| Temperature/K                                    | 293(2)                                                                                         | 293(2)                                                                                         | 293(2)                                                                                         | 293(2)                                                                                         |
| Crystal system                                   | Monoclinic                                                                                     | Monoclinic                                                                                     | Orthorhombic                                                                                   | Orthorhombic                                                                                   |
| Space group                                      | <i>P</i> 2 <sub>1</sub>                                                                        | <i>P</i> 2 <sub>1</sub>                                                                        | <i>P</i> 2 <sub>1</sub> 2 <sub>1</sub> 2 <sub>1</sub>                                          | <i>P</i> 2 <sub>1</sub> 2 <sub>1</sub> 2 <sub>1</sub>                                          |
| <i>a</i> /Å                                      | 9.3137(10)                                                                                     | 9.3099(10)                                                                                     | 5.8315(4)                                                                                      | 5.8283(4)                                                                                      |
| <i>b</i> /Å                                      | 6.7659(10)                                                                                     | 6.7679(10)                                                                                     | 14.1609(11)                                                                                    | 14.1608(10)                                                                                    |
| <i>c</i> /Å                                      | 9.6874(10)                                                                                     | 9.6863(10)                                                                                     | 15.1674(10)                                                                                    | 15.1852(12)                                                                                    |
| $\alpha$ /°                                      | 90                                                                                             | 90                                                                                             | 90                                                                                             | 90                                                                                             |
| $\beta$ /°                                       | 97.631(10)                                                                                     | 97.620(10)                                                                                     | 90                                                                                             | 90                                                                                             |
| $\gamma$ /°                                      | 90                                                                                             | 90                                                                                             | 90                                                                                             | 90                                                                                             |
| Volume/Å <sup>3</sup>                            | 605.051(13)                                                                                    | 604.929(13)                                                                                    | 1252.51(15)                                                                                    | 1253.29(16)                                                                                    |
| <i>Z</i>                                         | 2                                                                                              | 2                                                                                              | 4                                                                                              | 4                                                                                              |
| $\rho_{\text{calc}}/\text{g}\cdot\text{cm}^{-3}$ | 1.740                                                                                          | 1.740                                                                                          | 1.985                                                                                          | 1.984                                                                                          |
| $\mu/\text{mm}^{-1}$                             | 16.749                                                                                         | 16.752                                                                                         | 2.565                                                                                          | 2.563                                                                                          |
| <i>F</i> (000)                                   | 322                                                                                            | 322                                                                                            | 736                                                                                            | 736                                                                                            |
| $\theta$ range/°                                 | 6.194 to 76.352                                                                                | 4.606 to 76.074                                                                                | 2.686 to 27.155                                                                                | 2.683 to 26.689                                                                                |
| Index ranges                                     | -11 ≤ <i>h</i> ≤ 11,<br>-8 ≤ <i>k</i> ≤ 8,<br>-12 ≤ <i>l</i> ≤ 11                              | -11 ≤ <i>h</i> ≤ 11,<br>-8 ≤ <i>k</i> ≤ 8,<br>-12 ≤ <i>l</i> ≤ 12                              | -7 ≤ <i>h</i> ≤ 7,<br>-18 ≤ <i>k</i> ≤ 18,<br>-19 ≤ <i>l</i> ≤ 15                              | -7 ≤ <i>h</i> ≤ 7,<br>-17 ≤ <i>k</i> ≤ 17,<br>-19 ≤ <i>l</i> ≤ 19                              |
| Reflections collected                            | 10009                                                                                          | 10652                                                                                          | 17943                                                                                          | 17682                                                                                          |
| Independent Reflections                          | 2443 ( <i>R</i> <sub>int</sub> = 0.0435)                                                       | 2472 ( <i>R</i> <sub>int</sub> = 0.0272)                                                       | 2891 ( <i>R</i> <sub>int</sub> = 0.0462)                                                       | 2652 ( <i>R</i> <sub>int</sub> = 0.0627)                                                       |
| Goodness-of-fit                                  | 1.049                                                                                          | 1.107                                                                                          | 1.027                                                                                          | 1.055                                                                                          |
| Final <i>R</i> indexes                           | <i>R</i> <sub>1</sub> =0.0387, <i>wR</i> <sub>2</sub> =0.1006                                  | <i>R</i> <sub>1</sub> =0.0234, <i>wR</i> <sub>2</sub> =0.0632                                  | <i>R</i> <sub>1</sub> =0.0282, <i>wR</i> <sub>2</sub> =0.0424                                  | <i>R</i> <sub>1</sub> =0.0282, <i>wR</i> <sub>2</sub> =0.0668                                  |
| $\Delta\rho_{\text{max}}(\text{e}/\text{\AA}^3)$ | 0.92                                                                                           | 0.23                                                                                           | 0.31                                                                                           | 0.33                                                                                           |
| $\Delta\rho_{\text{min}}(\text{e}/\text{\AA}^3)$ | -0.69                                                                                          | -0.34                                                                                          | -0.46                                                                                          | -1.28                                                                                          |
| Flack parameter                                  | 0.010(7)                                                                                       | -0.004(5)                                                                                      | -0.024(17)                                                                                     | -0.004(18)                                                                                     |

**Table S2.** Fractional atomic coordinates and isotropic or equivalent isotropic displacement parameters ( $\text{\AA}^2$ ).

| Atom | x           | y           | z           | $U_{iso}^*/U_{eq}$ |
|------|-------------|-------------|-------------|--------------------|
| R-Mn |             |             |             |                    |
| Mn1  | 0.53173(7)  | 0.64105(9)  | 0.68789(7)  | 0.0186(2)          |
| Cl1  | 0.25625(10) | 0.67041(17) | 0.68708(11) | 0.0268(3)          |
| Cl2  | 0.52719(10) | 0.82289(12) | 0.45575(10) | 0.0234(2)          |
| Cl3  | 0.57962(11) | 0.93822(16) | 0.84621(10) | 0.0272(3)          |
| Cl4  | 0.79855(10) | 0.58974(16) | 0.68266(11) | 0.0261(3)          |
| N1   | 1.2020(4)   | 0.6240(6)   | 0.3554(4)   | 0.0264(8)          |
| H1A  | 1.213435    | 0.601502    | 0.446673    | 0.032              |
| H1B  | 1.217014    | 0.751559    | 0.339834    | 0.032              |
| H1C  | 1.265326    | 0.551681    | 0.315996    | 0.032              |
| N2   | 0.7956(4)   | 0.6397(6)   | 0.3066(4)   | 0.0295(8)          |
| H2A  | 0.733855    | 0.709765    | 0.349519    | 0.035              |
| H2B  | 0.778624    | 0.512209    | 0.320369    | 0.035              |
| O1   | 0.5496(4)   | 0.4349(5)   | 0.8661(3)   | 0.0304(7)          |
| H1F  | 0.533710    | 0.459332    | 0.950281    | 0.046              |
| H1G  | 0.574113    | 0.311749    | 0.867379    | 0.046              |
| C1   | 0.9464(4)   | 0.6879(7)   | 0.3685(4)   | 0.0234(8)          |
| H1D  | 0.960026    | 0.655892    | 0.466945    | 0.028              |
| H1E  | 0.964342    | 0.828065    | 0.358555    | 0.028              |
| C2   | 1.0515(4)   | 0.5692(6)   | 0.2942(4)   | 0.0208(8)          |
| H2   | 1.036412    | 0.428085    | 0.309882    | 0.025              |
| C3   | 1.0308(5)   | 0.6094(8)   | 0.1389(4)   | 0.0299(10)         |
| H3A  | 1.096097    | 0.526974    | 0.093812    | 0.036              |
| H3B  | 1.053002    | 0.746587    | 0.121778    | 0.036              |
| C4   | 0.8748(5)   | 0.5648(8)   | 0.0791(5)   | 0.0328(10)         |
| H4A  | 0.860171    | 0.596710    | -0.019367   | 0.039              |
| H4B  | 0.855959    | 0.424865    | 0.088896    | 0.039              |
| C5   | 0.7698(5)   | 0.6831(8)   | 0.1532(5)   | 0.0336             |
| H5A  | 0.783269    | 0.823147    | 0.137622    | 0.040              |
| H5B  | 0.671112    | 0.648696    | 0.116161    | 0.040              |
| S-Mn |             |             |             |                    |
| Mn1  | 0.46824(5)  | 0.35979(7)  | 0.31214(5)  | 0.02247(13)        |
| Cl1  | 0.20120(8)  | 0.41115(12) | 0.31729(8)  | 0.02997(18)        |
| Cl2  | 0.47280(8)  | 0.17801(10) | 0.54410(7)  | 0.02706(17)        |
| Cl3  | 0.42044(8)  | 0.06287(12) | 0.15384(8)  | 0.03117(19)        |
| Cl4  | 0.74349(8)  | 0.33041(13) | 0.31253(8)  | 0.03071(17)        |
| N1   | -0.2023(3)  | 0.3772(4)   | 0.6444(3)   | 0.0307(6)          |
| H1C  | -0.265280   | 0.452548    | 0.681758    | 0.037              |
| H1D  | -0.218412   | 0.250773    | 0.662364    | 0.037              |



|     |            |           |           |           |
|-----|------------|-----------|-----------|-----------|
| H1E | -0.212823  | 0.395906  | 0.552616  | 0.037     |
| N2  | 0.2047(3)  | 0.3615(5) | 0.6940(3) | 0.0321(6) |
| H2A | 0.221794   | 0.488973  | 0.680413  | 0.039     |
| H2B | 0.266731   | 0.291501  | 0.651356  | 0.039     |
| O1  | 0.4506(3)  | 0.5667(4) | 0.1336(2) | 0.0349(5) |
| H1F | 0.422261   | 0.687394  | 0.131465  | 0.052     |
| H1G | 0.470406   | 0.544087  | 0.051066  | 0.052     |
| C1  | 0.0537(3)  | 0.3133(5) | 0.6315(3) | 0.0280(6) |
| H1D | 0.035828   | 0.173107  | 0.641272  | 0.034     |
| H1E | 0.040564   | 0.345375  | 0.533058  | 0.034     |
| C2  | -0.0516(3) | 0.4315(5) | 0.7053(3) | 0.0240(6) |
| H2  | -0.036462  | 0.572567  | 0.689617  | 0.029     |
| C3  | -0.0310(3) | 0.3915(6) | 0.8609(3) | 0.0341(8) |
| H3A | -0.053502  | 0.254446  | 0.877986  | 0.041     |
| H3B | -0.096221  | 0.474167  | 0.905802  | 0.041     |
| C4  | 0.1251(4)  | 0.4355(6) | 0.9211(3) | 0.0357(8) |
| H4A | 0.144214   | 0.575382  | 0.911715  | 0.043     |
| H4B | 0.139521   | 0.403013  | 1.019462  | 0.043     |
| C5  | 0.2297(4)  | 0.3180(6) | 0.8473(4) | 0.0375(8) |
| H5A | 0.328466   | 0.352176  | 0.884596  | 0.045     |
| H5B | 0.216187   | 0.177969  | 0.862598  | 0.045     |

---

*R*-Cd

---

|     |             |            |            |             |
|-----|-------------|------------|------------|-------------|
| Cd1 | 0.20074(6)  | 0.65371(2) | 0.52647(2) | 0.03537(10) |
| Cl1 | 0.19802(18) | 0.83413(6) | 0.47633(6) | 0.0285(2)   |
| Cl2 | 0.1926(2)   | 0.60643(7) | 0.36534(6) | 0.0301(2)   |
| Cl3 | 0.2141(2)   | 0.48433(8) | 0.58014(8) | 0.0429(3)   |
| Cl4 | 0.19117(19) | 0.71711(7) | 0.68355(6) | 0.0273(2)   |
| N1  | 0.6884(7)   | 0.6945(2)  | 0.7528(2)  | 0.0291(8)   |
| H1A | 0.821499    | 0.708750   | 0.727360   | 0.035       |
| H1B | 0.577361    | 0.721299   | 0.721286   | 0.035       |
| N2  | 0.8078(6)   | 0.4412(2)  | 0.8035(2)  | 0.0272(8)   |
| H2A | 0.797555    | 0.422156   | 0.747735   | 0.033       |
| H2B | 0.679404    | 0.426268   | 0.832017   | 0.033       |
| H2C | 0.926382    | 0.412827   | 0.829298   | 0.033       |
| O1  | 0.7275(6)   | 0.3953(2)  | 0.6235(2)  | 0.0461(9)   |
| H1E | 0.610866    | 0.427147   | 0.607870   | 0.069       |
| H1F | 0.840816    | 0.425170   | 0.602028   | 0.069       |
| C1  | 0.6573(8)   | 0.5908(3)  | 0.7513(3)  | 0.0281(11)  |
| H1C | 0.666078    | 0.568066   | 0.691032   | 0.034       |
| H1D | 0.507465    | 0.574676   | 0.774606   | 0.034       |
| C2  | 0.8413(7)   | 0.5450(3)  | 0.8061(2)  | 0.0225(10)  |

|     |           |           |           |            |
|-----|-----------|-----------|-----------|------------|
| H2  | 0.990549  | 0.559660  | 0.779686  | 0.027      |
| C3  | 0.8402(8) | 0.5807(3) | 0.8994(3) | 0.0336(12) |
| H3A | 0.965446  | 0.552317  | 0.932067  | 0.04       |
| H3B | 0.697476  | 0.563360  | 0.927918  | 0.040      |
| C4  | 0.8662(9) | 0.6877(3) | 0.8994(3) | 0.0418(14) |
| H4A | 0.853824  | 0.710968  | 0.959341  | 0.050      |
| H4B | 1.017140  | 0.704231  | 0.877366  | 0.050      |
| C5  | 0.6854(9) | 0.7347(3) | 0.8428(3) | 0.0422(12) |
| H5A | 0.535421  | 0.725205  | 0.868956  | 0.051      |
| H5B | 0.714497  | 0.802030  | 0.839969  | 0.051      |

---

S-Cd

---

|     |             |            |             |             |
|-----|-------------|------------|-------------|-------------|
| Cd1 | 0.79950(7)  | 0.34617(2) | 0.47350(2)  | 0.03402(13) |
| Cl1 | 0.80216(19) | 0.16595(6) | 0.52358(7)  | 0.0271(2)   |
| Cl2 | 0.80743(19) | 0.39346(7) | 0.63471(7)  | 0.0287(2)   |
| Cl3 | 0.7862(2)   | 0.51560(8) | 0.41992(10) | 0.0418(3)   |
| Cl4 | 0.80896(19) | 0.28293(7) | 0.31624(7)  | 0.0261(2)   |
| N1  | 0.3112(7)   | 0.3054(2)  | 0.2470(2)   | 0.0281(8)   |
| H1A | 0.422267    | 0.278474   | 0.278385    | 0.034       |
| H1B | 0.177959    | 0.291118   | 0.272364    | 0.034       |
| N2  | 0.1926(7)   | 0.5587(2)  | 0.1967(3)   | 0.0257(8)   |
| H2A | 0.320005    | 0.573409   | 0.167488    | 0.031       |
| H2B | 0.205338    | 0.577608   | 0.252388    | 0.031       |
| H2C | 0.073191    | 0.587321   | 0.171730    | 0.031       |
| O1  | 0.2725(6)   | 0.6045(3)  | 0.3759(2)   | 0.0439(9)   |
| H1E | 0.380528    | 0.573704   | 0.400150    | 0.066       |
| H1F | 0.150568    | 0.579229   | 0.395618    | 0.066       |
| C1  | 0.3427(7)   | 0.4096(3)  | 0.2486(3)   | 0.0256(10)  |
| H1C | 0.492150    | 0.425873   | 0.224997    | 0.031       |
| H1D | 0.334339    | 0.432411   | 0.308784    | 0.031       |
| C2  | 0.1576(6)   | 0.4545(3)  | 0.1942(3)   | 0.0196(9)   |
| H2  | 0.008434    | 0.439786   | 0.220657    | 0.024       |
| C3  | 0.1592(9)   | 0.4197(3)  | 0.1011(3)   | 0.0337(12)  |
| H3A | 0.301923    | 0.437544   | 0.072746    | 0.040       |
| H3B | 0.033679    | 0.448132   | 0.068612    | 0.040       |
| C4  | 0.1341(10)  | 0.3117(3)  | 0.1004(3)   | 0.0415(13)  |
| H4A | -0.016922   | 0.294574   | 0.122024    | 0.050       |
| H4B | 0.148138    | 0.288633   | 0.040524    | 0.050       |
| C5  | 0.3141(9)   | 0.2659(3)  | 0.1571(3)   | 0.0402(12)  |
| H5A | 0.286531    | 0.198385   | 0.159707    | 0.048       |
| H5B | 0.464134    | 0.275839   | 0.130990    | 0.048       |

---

**Table S3.** The main bond lengths of *R*-Mn and *S*-Mn.

| <i>R</i> -Mn |            | <i>S</i> -Mn |           |
|--------------|------------|--------------|-----------|
| Atom–Atom    | Length/Å   | Atom–Atom    | Length/Å  |
| Mn1–Cl1      | 2.5724(11) | Mn1–Cl1      | 2.5697(8) |
| Mn1–Cl2      | 2.5824(10) | Mn1–Cl2      | 2.5838(8) |
| Mn1–Cl2      | 2.5588(12) | Mn1–Cl2      | 2.5570(8) |
| Mn1–Cl3      | 2.5322(11) | Mn1–Cl3      | 2.5311(9) |
| Mn1–Cl4      | 2.5163(11) | Mn1–Cl4      | 2.5174(8) |
| Mn1–O1       | 2.209(3)   | Mn1–O1       | 2.214(2)  |
| N1–C2        | 1.495(5)   | N1–C2        | 1.493(5)  |
| N2–C1        | 1.488(5)   | N2–C1        | 1.491(4)  |
| N2–C5        | 1.503(6)   | N2–C5        | 1.501(5)  |
| C1–C2        | 1.519(5)   | C1–C2        | 1.516(4)  |
| C2–C3        | 1.516(6)   | C2–C3        | 1.518(4)  |
| C3–C4        | 1.521(6)   | C3–C4        | 1.522(5)  |
| C4–C5        | 1.516(7)   | C4–C5        | 1.509(5)  |

**Table S4.** The main bond angles of *R*-Mn and *S*-Mn.

| <i>R</i> -Mn   |            | <i>S</i> -Mn   |           |
|----------------|------------|----------------|-----------|
| Atom–Atom–Atom | Angles/°   | Atom–Atom–Atom | Angles/°  |
| Cl1–Mn1–Cl2    | 85.54(4)   | Cl1–Mn1–Cl2    | 85.60(3)  |
| Cl1–Mn1–Cl2    | 93.44(4)   | Cl1–Mn1–Cl2    | 93.50(3)  |
| Cl1–Mn1–Cl3    | 92.06(4)   | Cl1–Mn1–Cl3    | 91.98(3)  |
| Cl1–Mn1–Cl4    | 176.26(5)  | Cl1–Mn1–Cl4    | 176.30(4) |
| Cl2–Mn1–Cl2    | 87.12(2)   | Cl2–Mn1–Cl2    | 87.13(2)  |
| Cl2–Mn1–Cl3    | 97.56(4)   | Cl2–Mn1–Cl3    | 97.55(3)  |
| Cl2–Mn1–Cl3    | 174.87(3)  | Cl2–Mn1–Cl3    | 174.86(3) |
| Cl2–Mn1–Cl4    | 87.12(4)   | Cl2–Mn1–Cl4    | 87.16(3)  |
| Cl2–Mn1–Cl4    | 90.80(4)   | Cl2–Mn1–Cl4    | 90.80(3)  |
| Cl3–Mn1–Cl4    | 91.53(6)   | Cl3–Mn1–Cl4    | 91.54(3)  |
| O1–Mn1–Cl1     | 91.30(9)   | O1–Mn1–Cl1     | 91.19(7)  |
| O1–Mn1–Cl2     | 83.30(9)   | O1–Mn1–Cl2     | 83.24(7)  |
| O1–Mn1–Cl2     | 168.94(10) | O1–Mn1–Cl2     | 168.93(7) |
| O1–Mn1–Cl3     | 92.24(9)   | O1–Mn1–Cl3     | 92.29(7)  |
| O1–Mn1–Cl4     | 87.51(9)   | O1–Mn1–Cl4     | 87.53(7)  |
| Mn1–Cl2–Mn1    | 148.42(4)  | Mn1–Cl2–Mn1    | 148.45(2) |
| C1–N2–C5       | 111.9(3)   | C1–N2–C5       | 111.9(2)  |
| C1–C2–C3       | 111.8(3)   | C1–C2–C3       | 111.7(3)  |
| C2–C3–C4       | 109.3(4)   | C2–C3–C4       | 109.5(3)  |
| C3–C4–C5       | 111.0(4)   | C3–C4–C5       | 111.1(3)  |
| N1–C2–C1       | 108.1(3)   | N1–C2–C1       | 108.4(2)  |
| N1–C2–C3       | 109.7(4)   | N1–C2–C3       | 109.7(3)  |
| N2–C1–C2       | 109.1(3)   | N2–C1–C2       | 109.1(2)  |
| N2–C5–C4       | 109.7(4)   | N2–C5–C4       | 109.9(3)  |

**Table S5.** Hydrogen-bonds data of *R*-Mn and *S*-Mn.

| D–H…A        | d(D–H)/Å | d(H…A)/Å | d(D…A)/Å | ∠D–H…A/° |
|--------------|----------|----------|----------|----------|
| <i>R</i> -Mn |          |          |          |          |
| N1–H1A…Cl1   | 0.89     | 2.36     | 3.201(4) | 159      |
| N1–H1B…Cl4   | 0.89     | 2.30     | 3.173(4) | 166      |
| N1–H1C…Cl3   | 0.89     | 2.40     | 3.254(4) | 162      |
| N2–H2A…Cl2   | 0.89     | 2.42     | 3.291(4) | 165      |
| N2–H2B…Cl1   | 0.89     | 2.34     | 3.214(4) | 169      |
| <i>S</i> -Mn |          |          |          |          |
| N1–H1C…Cl3   | 0.89     | 2.41     | 3.252(3) | 159      |
| N1–H1D…Cl4   | 0.89     | 2.31     | 3.176(2) | 164      |
| N1–H1E…Cl1   | 0.89     | 2.35     | 3.203(3) | 161      |
| N2–H2A…Cl1   | 0.89     | 2.33     | 3.212(3) | 169      |
| N2–H2B…Cl2   | 0.89     | 2.42     | 3.293(3) | 165      |

**Table S6.** The main bond lengths of *R*-Cd and *S*-Cd.

| <i>R</i> -Cd |            | <i>S</i> -Cd |            |
|--------------|------------|--------------|------------|
| Atom–Atom    | Length/Å   | Atom–Atom    | Length/Å   |
| Cd1–Cl1      | 2.6658(10) | Cd1–Cl1      | 2.6629(10) |
| Cd1–Cl1      | 2.9053(11) | Cd1–Cl1      | 2.9040(11) |
| Cd1–Cl2      | 2.5344(10) | Cd1–Cl2      | 2.5385(10) |
| Cd1–Cl3      | 2.5342(11) | Cd1–Cl3      | 2.5347(11) |
| Cd1–Cl4      | 2.5466(10) | Cd1–Cl4      | 2.5510(10) |
| N1–C1        | 1.480(5)   | N1–C1        | 1.487(5)   |
| N1–C5        | 1.478(5)   | N1–C5        | 1.476(6)   |
| N2–C2        | 1.483(5)   | N2–C2        | 1.490(5)   |
| C1–C2        | 1.505(5)   | C1–C2        | 1.501(5)   |
| C2–C3        | 1.504(5)   | C2–C3        | 1.498(6)   |
| C3–C4        | 1.522(6)   | C3–C4        | 1.537(6)   |
| C4–C5        | 1.513(6)   | C4–C5        | 1.503(7)   |

**Table S7.** The main bond angles of *R*-Cd and *S*-Cd.

| <i>R</i> -Cd   |           | <i>S</i> -Cd   |           |
|----------------|-----------|----------------|-----------|
| Atom–Atom–Atom | Angles/°  | Atom–Atom–Atom | Angles/°  |
| Cl1–Cd1–Cl1    | 86.20(3)  | Cl1–Cd1–Cl1    | 86.21(3)  |
| Cl1–Cd1–Cl2    | 88.74(3)  | Cl1–Cd1–Cl2    | 88.70(3)  |
| Cl1–Cd1–Cl2    | 89.02(3)  | Cl1–Cd1–Cl2    | 89.01(3)  |
| Cl1–Cd1–Cl3    | 177.41(4) | Cl1–Cd1–Cl3    | 177.43(4) |
| Cl1–Cd1–Cl3    | 95.22(4)  | Cl1–Cd1–Cl3    | 95.21(4)  |
| Cl1–Cd1–Cl4    | 85.92(3)  | Cl1–Cd1–Cl4    | 86.03(3)  |
| Cl1–Cd1–Cl4    | 88.34(3)  | Cl1–Cd1–Cl4    | 88.40(3)  |
| Cl2–Cd1–Cl3    | 93.45(4)  | Cl2–Cd1–Cl3    | 93.46(4)  |
| Cl2–Cd1–Cl4    | 177.41(4) | Cl2–Cd1–Cl4    | 174.27(3) |
| Cl3–Cd1–Cl4    | 91.94(4)  | Cl3–Cd1–Cl4    | 91.86(4)  |
| Cd1–Cl1–Cd1    | 93.84(3)  | Cd1–Cl1–Cd1    | 93.83(3)  |
| C1–N1–C5       | 113.3(3)  | C1–N1–C5       | 113.0(3)  |
| C1–C2–C3       | 111.8(4)  | C1–C2–C3       | 112.1(3)  |
| C2–C3–C4       | 109.6(3)  | C2–C3–C4       | 109.5(4)  |
| C3–C4–C5       | 111.6(4)  | C3–C4–C5       | 111.1(4)  |
| N1–C1–C2       | 109.4(4)  | N1–C1–C2       | 108.8(4)  |
| N1–C5–C4       | 110.3(4)  | N1–C5–C4       | 110.9(4)  |
| N2–C2–C1       | 108.6(3)  | N2–C2–C1       | 107.9(3)  |
| N2–C2–C3       | 111.0(3)  | N2–C2–C3       | 111.4(3)  |

**Table S8.** Hydrogen-bonds data of *R*-Cd and *S*-Cd.

| D-H...A      | d(D-H)/Å | d(H...A)/Å | d(D...A)/Å | ∠D-H...A/° |
|--------------|----------|------------|------------|------------|
| <i>R</i> -Cd |          |            |            |            |
| N1-H1A...Cl4 | 0.89     | 2.26       | 3.131(4)   | 166        |
| N1-H1B...Cl4 | 0.89     | 2.32       | 3.101(4)   | 146        |
| N2-H2A...O1  | 0.89     | 1.97       | 2.845(4)   | 170        |
| N2-H2B...Cl2 | 0.89     | 2.28       | 3.139(3)   | 163        |
| N2-H2C...Cl2 | 0.89     | 2.30       | 3.134(3)   | 155        |
| O1-H1E...Cl3 | 0.85     | 2.49       | 3.314(3)   | 165        |
| O1-H1F...Cl3 | 0.85     | 2.36       | 3.173(3)   | 162        |
| <i>S</i> -Cd |          |            |            |            |
| N1-H1A...Cl4 | 0.89     | 2.33       | 3.102(4)   | 146        |
| N1-H1B...Cl4 | 0.89     | 2.25       | 3.127(4)   | 166        |
| N2-H2A...Cl2 | 0.89     | 2.28       | 3.136(4)   | 162        |
| N2-H2C...Cl2 | 0.89     | 2.30       | 3.137(4)   | 156        |
| N2-H2B...O1  | 0.89     | 1.95       | 2.836(5)   | 171        |
| O1-H1E...Cl3 | 0.85     | 2.52       | 3.316(4)   | 156        |
| O1-H1F...Cl3 | 0.85     | 2.34       | 3.173(3)   | 168        |
